# Supplementary material
Source: publisher figshare collection journal article supplement (https://geolsoc.figshare.com/ndownloader/files/31011083)
Supplement: Supplementary file 1 [file 31011083]

## Sheet: Sheet1
All Sample	Location	lat	long	Dip/Strike	Description	U-Pb Dating	Comments
S01	New Aberdour	57°40'23.40"N	2°11'47.95"W	74°/290°	Calcite vein sample from major dextral 'Fault II' - e.g. Figs 13a, c	<1ppb 238U, no further analysis was carried out	Thin sections from these three representative samples are used in this paper to illustrate our findings (Fig. 13)
S02	New Aberdour	57°40'23.57"N	2°11'52.29"W	68° / 319°	Calcite vein sample from minor dextral fault in proximity and parallel to major 'Fault I'- e.g. Figs 13d-f	131±0.75 Ma (Hauterivian).
S03	New Aberdour	57°40'23.57"N	2°11'52.29"W	75°/153°	Calcite vein sample from minor dextral fault in proximity and parallel to major 'Fault I'- e.g. Fig 13b	<1ppb 238U, no further analysis was carried out
Na02	New Aberdour	57°40'23.57"N	2°11'52.29"W	75°/243°	Calcite vein sample from minor antithetic sinistral fault in proximity to the major 'Fault I'	Sample was found to have >1ppb 238U so was analysed fully (see Calcite Dating Data). Due to excess common lead no age could be determined.	Additional samples not included in the paper as they do not bring more information.
CB01	Pennan	57°40'23.57"N	2°15'58.69"	76°/290°	Sample from calcite cemented fault breccia.	<1ppb 238U, no further analysis was carried out
